# Supplementary material for: Most women recover from psychological distress after postoperative complications following implant or DIEP flap breast reconstruction: A prospective long-term follow-up study
Source: PubMed Central journal article supplement (PMC5367706; doi:10.1371/journal.pone.0174455), 2017-03-27
Supplement: pone.0174455.s003.pdf [file pone.0174455.s003.pdf]

**S3 Appendix.** Multilevel models with additional surgery and total reconstruction failure as predictors of psychological distress in women undergoing BR and the covariates reconstruction type, radio therapy and age.

|                              | Intercept |         | time linear |         | time quadratic |         |
|------------------------------|-----------|---------|-------------|---------|----------------|---------|
|                              | estimate  | p-value | estimate    | p-value | estimate       | p-value |
| <b>Anxiety</b>               |           |         |             |         |                |         |
| No covariate effects         | 5.31      | <.001   | -1.58       | .010    | 0.07           | .012    |
| Additional surgery           | -0.12     | .856    | 1.43        | .047    | -0.07          | .036    |
| Total reconstruction failure | 1.65      | .177    | -0.14       | .909    | 0.01           | .927    |
| DIEP vs. implantation        | -0.84     | .184    | 0.35        | .593    | -0.01          | .647    |
| Radio therapy                | -0.06     | .933    | 0.58        | .406    | -0.03          | .389    |
| Age                          | -0.12     | .001    | 0.01        | .887    | 0.00           | .908    |
| <b>Depression</b>            |           |         |             |         |                |         |
| No covariate effects         | 5.32      | <.001   | -0.04       | .955    | 0.00           | .988    |
| Additional surgery           | -0.05     | .948    | 0.76        | .376    | -0.04          | .327    |
| Total reconstruction failure | 0.70      | .622    | 3.43        | .023    | -0.16          | .020    |
| DIEP vs. implantation        | -0.16     | .825    | 0.59        | .455    | -0.03          | .459    |
| Radio therapy                | -0.08     | .914    | 0.52        | .530    | -0.02          | .529    |
| Age                          | -0.08     | .055    | -0.04       | .355    | 0.00           | .336    |
| <b>Cancer distress</b>       |           |         |             |         |                |         |
| No covariate effects         | 24.23     | <.001   | -8.55       | <.001   | 0.39           | <.001   |
| Additional surgery           | -0.37     | .879    | 1.22        | .570    | -0.06          | .545    |
| Total reconstruction failure | 6.58      | .136    | 0.71        | .855    | -0.04          | .838    |
| DIEP vs. implantation        | -5.77     | .010    | 2.73        | .169    | -0.12          | .205    |
| Radio therapy                | 1.92      | .408    | 2.22        | .286    | -0.11          | .265    |
| Age                          | -0.16     | .215    | -0.30       | .011    | 0.01           | .013    |
